# Supplementary material for: Peer-provided psychological intervention for Syrian refugees: results of a randomised controlled trial on the effectiveness of Problem Management Plus
Source: PubMed Central journal article supplement (PMC10035776; doi:10.1136/bmjment-2022-300637), 2023-02-08
Supplement: bmjment-2022-300637supp002.pdf [file bmjment-2022-300637supp002.pdf]

Table S1.  
*Baseline Characteristics of Participants Retained and Lost at Follow-Up*

|                                                                                      | Retained at 3-month follow-up<br>(n=176) | Lost at 3-month follow-up (n=30) | t/ $\chi^2$ | p    |
|--------------------------------------------------------------------------------------|------------------------------------------|----------------------------------|-------------|------|
| Sex, n of men (%)                                                                    | 105 (59.7%)                              | 22 (73.3%)                       | 2.027       | 0.15 |
| Age, M (SD) [range]                                                                  | 36.98 (11.56)<br>[18-69]                 | 33.80 (12.44)<br>[20-62]         | 1.378       | 0.17 |
| Marital status, n (%)                                                                |                                          |                                  | 6.505       | 0.26 |
| Never married                                                                        | 12 (40.0%)                               | 58 (33.0%)                       |             |      |
| Currently married                                                                    | 12 (40.0%)                               | 87 (49.4%)                       |             |      |
| Separated                                                                            | 2 (6.7%)                                 | 2 (1.1%)                         |             |      |
| Divorced                                                                             | 4 (13.3%)                                | 20 (11.4%)                       |             |      |
| Widowed                                                                              | 0                                        | 5 (2.8%)                         |             |      |
| Cohabiting                                                                           | 0                                        | 4 (2.3%)                         |             |      |
| Work status                                                                          |                                          |                                  | 7.570       | 0.47 |
| Paid work                                                                            | 32 (18.2%)                               | 4 (13.3%)                        |             |      |
| Non-paid work                                                                        | 27 (15.3%)                               | 3 (10.0%)                        |             |      |
| Keeping house                                                                        | 4 (2.3%)                                 | 3 (10.0%)                        |             |      |
| Retired                                                                              | 2 (1.1%)                                 | 0                                |             |      |
| Unemployed                                                                           | 33 (18.8%)                               | 7 (23.3%)                        |             |      |
| Student                                                                              | 70 (39.8%)                               | 11 (36.7%)                       |             |      |
| Other                                                                                | 8 (4.5%)                                 | 2 (6.7%)                         |             |      |
| Refugee status, n (%)                                                                |                                          |                                  | 6.460       | 0.09 |
| Asylum procedure ongoing                                                             | 11 (6.3%)                                | 5 (16.7%)                        |             |      |
| Resident permit                                                                      | 129 (73.3%)                              | 21 (70.0%)                       |             |      |
| Dutch citizenship                                                                    | 24 (13.6%)                               | 2 (6.7%)                         |             |      |
| Other                                                                                | 1 (0.6%)                                 | 1 (3.3%)                         |             |      |
| Missing                                                                              | 10 (6.3%)                                | 1 (3.3%)                         |             |      |
| Time elapsed (months) since arriving in the Netherlands, <sup>a</sup> M (SD) [range] | 44.40 (22.67) [1-97]                     | 42.13 (25.61) [2-113]            | 0.497       | 0.62 |
| Educational level, n (%)                                                             |                                          |                                  | 2.334       | 0.31 |
| No/basic education                                                                   | 24 (13.6%)                               | 6 (20.0%)                        |             |      |
| Secondary education                                                                  | 61 (34.7%)                               | 13 (43.3%)                       |             |      |
| Tertiary education                                                                   | 91 (51.7%)                               | 11 (36.7%)                       |             |      |
| Depression and anxiety (HSCL-25 total)                                               | 2.35 (.64)                               | 2.43 (.50)                       | -0.677      | 0.49 |
| PTSD symptoms (PCL-5), M (SD)                                                        | 33.76 (16.91)                            | 38.13 (16.83)                    | -1.310      | 0.19 |
| Functional impairment (WHODAS 2.0), M (SD)                                           | 29.36 (7.73)                             | 30.07 (7.81)                     | -0.464      | 0.32 |
| Self-identified problems (PSYCHLOPS), M (SD)                                         | 15.59 (3.53)                             | 15.30 (3.81)                     | 0.412       | 0.34 |
| Number of traumatic events, M (SD) [range]                                           | 9.76 (5.11) [0-26]                       | 8.70 (4.97) [1-18]               | 1.056       | 0.29 |
| PMLD, M (SD) [range]                                                                 | 6.81 (3.55) [0-16]                       | 7.76 (3.51) [2-15]               | -1.364      | 0.17 |

<sup>a</sup> n=200; PMLD = post-migration living difficulties; PTSD = posttraumatic stress disorder
