# Supplementary material for: Peer-provided psychological intervention for Syrian refugees: results of a randomised controlled trial on the effectiveness of Problem Management Plus
Source: PubMed Central journal article supplement (PMC10035776; doi:10.1136/bmjment-2022-300637), 2023-02-08
Supplement: bmjment-2022-300637supp003.pdf [file bmjment-2022-300637supp003.pdf]

Table S2.  
 Summary Statistics and Results from Mixed-Model Analysis of Primary and Secondary Outcomes for Participants Retained at 3-Month Follow-Up

| Outcome                   | Time point                  | Descriptive statistics, <i>M (SD)</i> |                             |          |                      | Mixed-model analysis                         |                 |                          |
|---------------------------|-----------------------------|---------------------------------------|-----------------------------|----------|----------------------|----------------------------------------------|-----------------|--------------------------|
|                           |                             | <i>N</i>                              | PM+/CAU<br>( <i>n</i> =103) | <i>N</i> | CAU ( <i>n</i> =103) | Difference in Least Squares<br>mean (95% CI) | <i>p</i> -value | Effect size <sup>b</sup> |
| <b>Primary outcome</b>    |                             |                                       |                             |          |                      |                                              |                 |                          |
| HSCL-25<br>Total          | Baseline                    | 84                                    | 2.29 (0.66)                 | 92       | 2.40 (0.63)          |                                              |                 |                          |
|                           | Overall effect <sup>a</sup> |                                       |                             |          |                      | -0.291 (-0.404, -0.179)                      | <0.0001         | 0.46                     |
|                           | Post-assessment             | 78                                    | 1.88 (0.59)                 | 87       | 2.30 (0.67)          | -0.329 (-0.464, -0.194)                      | <0.0001         | 0.52                     |
|                           | 3-months follow-up          | 82                                    | 1.88 (0.61)                 | 91       | 2.23 (0.63)          | -0.257 (-0.389, -0.124)                      | 0.0001          | 0.41                     |
| HSCL-25<br>Depression     | Baseline                    | 84                                    | 2.39 (0.72)                 | 92       | 2.51 (0.70)          |                                              |                 |                          |
|                           | Overall effect <sup>a</sup> |                                       |                             |          |                      | -0.313 (-0.437, -0.189)                      | <0.0001         | 0.47                     |
|                           | Post-assessment             | 78                                    | 1.93 (0.62)                 | 87       | 2.37 (0.74)          | -0.350 (-0.499, -0.200)                      | <0.0001         | 0.51                     |
|                           | 3-months follow-up          | 82                                    | 1.91 (0.63)                 | 91       | 2.28 (0.69)          | -0.279 (-0.425, -0.132)                      | 0.0002          | 0.42                     |
| HSCL-25<br>Anxiety        | Baseline                    | 84                                    | 2.13 (0.65)                 | 92       | 2.25 (0.64)          |                                              |                 |                          |
|                           | Overall effect <sup>a</sup> |                                       |                             |          |                      | -0.267 (-0.385, -0.148)                      | <0.0001         | 0.42                     |
|                           | Post-assessment             | 78                                    | 1.82 (0.62)                 | 87       | 2.37 (0.74)          | -0.306 (-0.448, -0.162)                      | <0.0001         | 0.48                     |
|                           | 3-months follow-up          | 82                                    | 1.84 (0.64)                 | 91       | 2.15 (0.64)          | -0.231 (-0.370, -0.090)                      | 0.001           | 0.36                     |
| <b>Secondary outcomes</b> |                             |                                       |                             |          |                      |                                              |                 |                          |
| PCL-5                     | Baseline                    | 84                                    | 32.48 (17.73)               | 92       | 34.94 (16.13)        |                                              |                 |                          |
|                           | Overall effect <sup>a</sup> |                                       |                             |          |                      | -6.79 (-9.906, -3.682)                       | <0.0001         | 0.41                     |
|                           | Post-assessment             | 78                                    | 20.09 (17.01)               | 87       | 29.06 (16.77)        | -7.05 (-10.827, -3.281)                      | 0.0002          | 0.42                     |
|                           | 3-months follow-up          | 82                                    | 19.79 (16.59)               | 92       | 25.88 (7.38)         | -6.56 (-10.246, -2.866)                      | 0.0005          | 0.40                     |
| WHODAS 2.0                | Baseline                    | 84                                    | 28.83 (8.08)                | 92       | 29.84 (7.40)         |                                              |                 |                          |
|                           | Overall effect <sup>a</sup> |                                       |                             |          |                      | -1.83 (-3.406, -0.259)                       | 0.02            | 0.23                     |
|                           | Post-assessment             | 78                                    | 24.45 (8.07)                | 87       | 27.00 (8.06)         | -1.97 (-3.887, -0.049)                       | 0.04            | 0.24                     |
|                           | 3-months follow-up          | 82                                    | 23.40 (8.25)                | 92       | 25.88 (7.38)         | -1.70 (-3.582, 0.171)                        | 0.07            | 0.22                     |
| PSYCHLOPS                 | Baseline                    | 84                                    | 15.17 (3.90)                | 92       | 15.98 (3.13)         |                                              |                 |                          |
|                           | Overall effect <sup>a</sup> |                                       |                             |          |                      | -1.90 (-2.901, -0.905)                       | <0.0001         | 0.39                     |
|                           | Post-assessment             | 78                                    | 11.36 (4.82)                | 86       | 14.09 (4.37)         | -2.42 (-3.683, -1.152)                       | 0.0002          | 0.53                     |
|                           | 3-months follow-up          | 84                                    | 10.56 (5.38)                | 91       | 12.25 (4.74)         | -1.40 (-2.624, -0.170)                       | 0.02            | 0.28                     |

<sup>a</sup> This is the overall effect of condition on average over the two follow-up assessments; <sup>b</sup> Effect sizes were calculated using the difference in least square means between the PM+/CAU and CAU group divided by the pooled *SD* at that assessment.
