# Supplementary material for: Peer-provided psychological intervention for Syrian refugees: results of a randomised controlled trial on the effectiveness of Problem Management Plus
Source: PubMed Central journal article supplement (PMC10035776; doi:10.1136/bmjment-2022-300637), 2023-02-08
Supplement: bmjment-2022-300637supp004.pdf [file bmjment-2022-300637supp004.pdf]

Table S3.  
 Summary Statistics and Results from Mixed-Model Analysis of Primary and Secondary Outcomes for Per Protocol Sample

| Outcome                   | Time point                  | Descriptive statistics, <i>M (SD)</i> |                          |          |                      | Mixed-model analysis                      |                 |                          |
|---------------------------|-----------------------------|---------------------------------------|--------------------------|----------|----------------------|-------------------------------------------|-----------------|--------------------------|
|                           |                             | <i>N</i>                              | PM+/CAU ( <i>n</i> =103) | <i>N</i> | CAU ( <i>n</i> =103) | Difference in Least Squares mean (95% CI) | <i>p</i> -value | Effect size <sup>b</sup> |
| <b>Primary outcome</b>    |                             |                                       |                          |          |                      |                                           |                 |                          |
| HSCL-25<br>Total          | Baseline                    | 87                                    | 2.29 (0.67)              | 103      | 2.41 (0.61)          |                                           |                 |                          |
|                           | Overall effect <sup>a</sup> |                                       |                          |          |                      | -0.293 (-0.403, -0.182)                   | <0.0001         | 0.46                     |
|                           | Post-assessment             | 82                                    | 1.91 (0.61)              | 93       | 2.31 (0.66)          |                                           |                 |                          |
| HSCL-25<br>Depression     | 3-months follow-up          | 79                                    | 1.88 (0.62)              | 91       | 2.23 (0.63)          | -0.327 (-0.458, -0.196)                   | <0.0001         | 0.51                     |
|                           | Baseline                    | 87                                    | 2.40 (0.73)              | 103      | 2.52 (0.69)          | -0.258 (-0.390, -0.125)                   | <0.0001         | 0.41                     |
|                           | Overall effect <sup>a</sup> |                                       |                          |          |                      | -0.312 (-0.434, -0.190)                   | <0.0001         | 0.46                     |
| HSCL-25<br>Anxiety        | Post-assessment             | 82                                    | 1.96 (0.63)              | 93       | 2.37 (0.73)          | -0.345 (-0.490, -0.200)                   | <0.0001         | 0.50                     |
|                           | 3-months follow-up          | 79                                    | 1.91 (0.63)              | 92       | 2.28 (0.69)          | 0.278 (-0.425, -0.131)                    | 0.0002          | 0.42                     |
|                           | Baseline                    | 87                                    | 2.13 (0.67)              | 103      | 2.24 (0.61)          |                                           |                 |                          |
|                           | Overall effect <sup>a</sup> |                                       |                          |          |                      | -0.270 (-0.386, -0.153)                   | <0.0001         | 0.42                     |
|                           | Post-assessment             | 82                                    | 1.85 (0.66)              | 93       | 2.21 (0.64)          | -0.305 (-0.444, -0.166)                   | <0.0001         | 0.47                     |
|                           | 3-months follow-up          | 79                                    | 1.83 (0.64)              | 91       | 2.15 (0.64)          | -0.234 (-0.374, -0.093)                   | 0.001           | 0.36                     |
| <b>Secondary outcomes</b> |                             |                                       |                          |          |                      |                                           |                 |                          |
| PCL-5                     | Baseline                    | 87                                    | 32.90 (18.40)            | 103      | 35.57 (15.96)        |                                           |                 |                          |
|                           | Overall effect <sup>a</sup> |                                       |                          |          |                      | -6.699 (-9.761, -3.639)                   | <0.0001         | 0.40                     |
|                           | Post-assessment             | 82                                    | 21.04 (17.56)            | 92       | 28.80 (16.54)        | -6.778 (-10.438, -3.119)                  | <0.0001         | 0.40                     |
| WHODAS 2.0                | 3-months follow-up          | 79                                    | 19.76 (16.72)            | 92       | 28.22 (16.38)        | -6.619 (-10.312, -2.929)                  | <0.0001         | 0.40                     |
|                           | Baseline                    | 87                                    | 29.11 (8.27)             | 103      | 29.84 (7.38)         |                                           |                 |                          |
|                           | Overall effect <sup>a</sup> |                                       |                          |          |                      | -1.530 (-3.072, 0.0106)                   | 0.05            | 0.19                     |
| PSYCHLOPS                 | Post-assessment             | 82                                    | 24.95 (8.60)             | 93       | 26.90 (7.90)         | -1.652 (-3.509, 0.205)                    | 0.08            | 0.20                     |
|                           | 3-months follow-up          | 79                                    | 23.62 (8.30)             | 92       | 25.88 (7.38)         | -1.406 (-3.285, 0.472)                    | 0.14            | 0.18                     |
|                           | Baseline                    | 87                                    | 15.17 (3.92)             | 103      | 15.72 (3.43)         |                                           |                 |                          |
|                           | Overall effect <sup>a</sup> |                                       |                          |          |                      | -1.740 (-2.723, -0.756)                   | <0.0001         | 0.35                     |
|                           | Post-assessment             | 82                                    | 11.55 (4.76)             | 92       | 13.86 (4.58)         | -2.136 (-3.367, -0.904)                   | <0.0001         | 0.46                     |
|                           | 3-months follow-up          | 80                                    | 10.51 (5.43)             | 91       | 12.25 (4.74)         | -1.334 (-2.578, -0.089)                   | 0.03            | 0.26                     |

<sup>a</sup> This is the overall effect of condition on average over the two follow-up assessments; <sup>b</sup> Effect sizes were calculated using the difference in least square means between the PM+/CAU and CAU group divided by the pooled *SD* at that assessment.
