# Supplementary material for: Peer-provided psychological intervention for Syrian refugees: results of a randomised controlled trial on the effectiveness of Problem Management Plus
Source: PubMed Central journal article supplement (PMC10035776; doi:10.1136/bmjment-2022-300637), 2023-02-08
Supplement: bmjment-2022-300637supp005.pdf [file bmjment-2022-300637supp005.pdf]

Table S4.

*Summary Statistics and Results from Mixed-Model Analysis of Primary Outcome for Different PM+ Delivery Formats*

| Outcome | Time point                         | Descriptive statistics, <i>M</i> ( <i>SD</i> ) |                                    |          |                                       |          |                      | Mixed-model analysis                      |                 |                          |                                  |                 |                          |
|---------|------------------------------------|------------------------------------------------|------------------------------------|----------|---------------------------------------|----------|----------------------|-------------------------------------------|-----------------|--------------------------|----------------------------------|-----------------|--------------------------|
|         |                                    | PM+/CAU                                        |                                    | CAU      |                                       |          |                      | Difference in Least Squares mean (95% CI) |                 |                          |                                  |                 |                          |
|         |                                    | <i>N</i>                                       | In-person sessions ( <i>n</i> =64) | <i>N</i> | Video/hybrid sessions ( <i>n</i> =38) | <i>N</i> | CAU ( <i>n</i> =103) | PM+ in-person sessions vs CAU             | <i>p</i> -value | Effect size <sup>b</sup> | PM+ video/hybrid sessions vs CAU | <i>p</i> -value | Effect size <sup>b</sup> |
| HSCL-25 | Baseline                           | 64                                             | 2.41 (0.64)                        | 38       | 2.14 (0.60)                           | 103      | 2.41 (0.61)          |                                           |                 |                          |                                  |                 |                          |
|         | Overall effect <sup>a</sup>        |                                                |                                    |          |                                       |          |                      | -0.37 (-0.493, -0.241)                    | <0.0001         | 0.58                     | -0.17 (-0.315, -0.028)           | 0.01            | 0.28                     |
|         | Post-assessment 3-months follow-up | 50                                             | 1.91 (0.63)                        | 35       | 1.91 (0.59)                           | 93       | 2.31 (0.66)          | -0.39 (-0.544, -0.244)                    | <0.0001         | 0.61                     | -0.21 (-0.383, -0.042)           | 0.01            | 0.33                     |
|         |                                    | 48                                             | 1.86 (0.62)                        | 34       | 1.90 (0.60)                           | 91       | 2.23 (0.63)          | -0.34 (-0.492, -0.188)                    | <0.0001         | 0.54                     | -0.13 (-0.301, -0.042)           | 0.14            | 0.21                     |

<sup>a</sup> This is the overall effect of condition on average over the two follow-up assessments; <sup>b</sup> Effect sizes were calculated using the difference in least square means between the PM+/CAU and CAU group divided by the pooled *SD* at that assessment.
